# Supplementary material
Source: PubMed Central journal article supplement (PMC2796837)
Supplement: NIHMS150023-supplement-Supp.pdf [file NIHMS150023-supplement-Supp.pdf]

## Supplementary Information

Azhar Pasha<sup>1</sup>, Mai Lin<sup>2</sup>, Gyula Tircsó<sup>1,3</sup>, Cynthia L. Rostollan<sup>2</sup>, Mark Woods<sup>1,4</sup>, Garry E.

Kiefer<sup>1,4</sup>✉, A. Dean Sherry<sup>1,5</sup>✉ and Xiankai Sun<sup>2</sup>✉

(1) Department of Chemistry, University of Texas at Dallas, P.O. Box 803066, Richardson,  
TX 75083, USA

(2) Department of Radiology, University of Texas Southwestern Medical Center, 5323 Harry  
Hines Blvd, Dallas, TX 75390-8542, USA

(3) Department of Inorganic and Analytical Chemistry, University of Debrecen, Egyetem ter  
1, P.f. 21, Debrecen, H-4010, Hungary

(4) Macrocyclics, 2110 Research Row, Suite 425, Dallas, TX, 75235, USA

(5) Advanced Imaging Research Center, University of Texas Southwestern Medical Center,  
5323 Harry Hines Blvd, NE 4.2, Dallas, TX 75390-8568, USA

✉ Garry E. Kiefer

Email: [Garry@macrocyclics.com](mailto:Garry@macrocyclics.com)

Fax: 972-250-2245

✉ A. Dean Sherry

Email: [Dean.Sherry@UTSouthwestern.edu](mailto:Dean.Sherry@UTSouthwestern.edu)

Fax: 214-645-2744

[sherry@utdallas.edu](mailto:sherry@utdallas.edu)

✉ Xiankai Sun

Email: [Xiankai.Sun@UTSouthwestern.edu](mailto:Xiankai.Sun@UTSouthwestern.edu)

Fax: 214-645-2885

1

## Supplementary Information

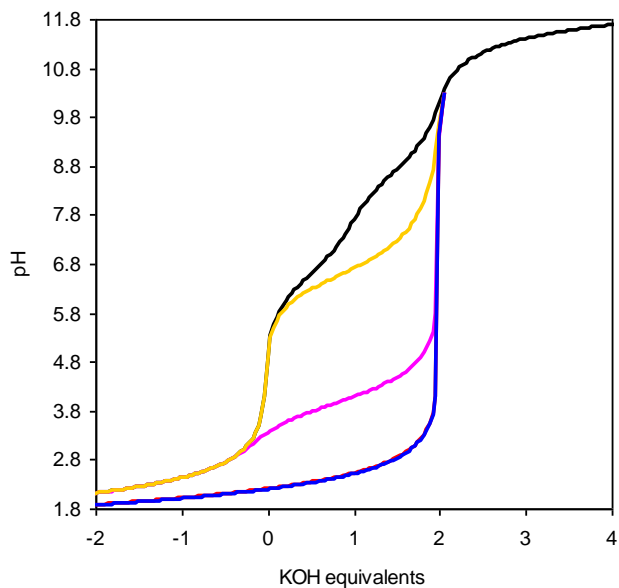

2

3

4 **Figure S1** The pH-potentiometric titration of L<sup>4</sup> in the absence (black) and presence of an  
5 equivalent Mg<sup>2+</sup> (yellow), Ca<sup>2+</sup> (pink), Zn<sup>2+</sup> (red) and Cu<sup>2+</sup> (blue) ( $C_{\text{tot}} = 3.92 \text{ mM}$ ,  $V_{\text{tot}} = 10.00$   
6  $\text{cm}^3$ ,  $I = 1.0 \text{ KCl}$  and  $t = 25 \text{ }^\circ\text{C}$ ).

7

8

9

10

11

12

13

14

15

16

17

18

19

20

1

## Supplementary Information

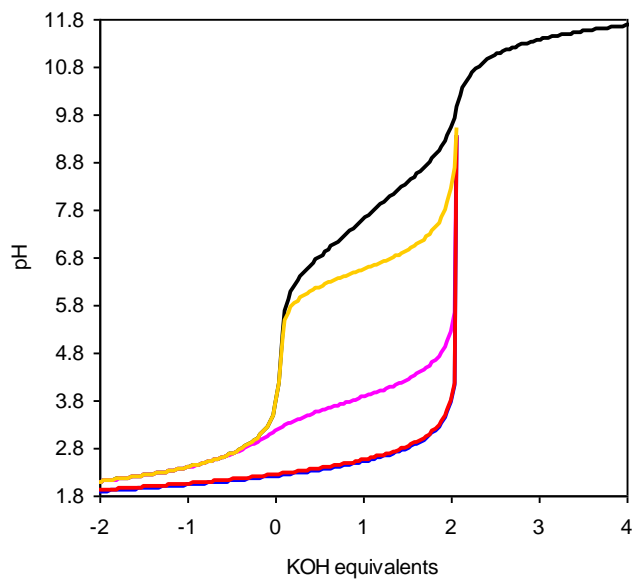

2

3

4 **Figure S2** The pH-potentiometric titration of L<sup>8</sup> in the absence (black) and presence of an  
5 equivalent Mg<sup>2+</sup> (yellow), Ca<sup>2+</sup> (pink), Zn<sup>2+</sup> (red) and Cu<sup>2+</sup> (blue) ( $C_{\text{tot}} = 3.92 \text{ mM}$ ,  $V_{\text{tot}} = 10.00$   
6  $\text{cm}^3$ ,  $I = 1.0 \text{ KCl}$  and  $t = 25 \text{ }^\circ\text{C}$ ).

7

8

9

10

11

12

13

14

15

1

## Supplementary Information

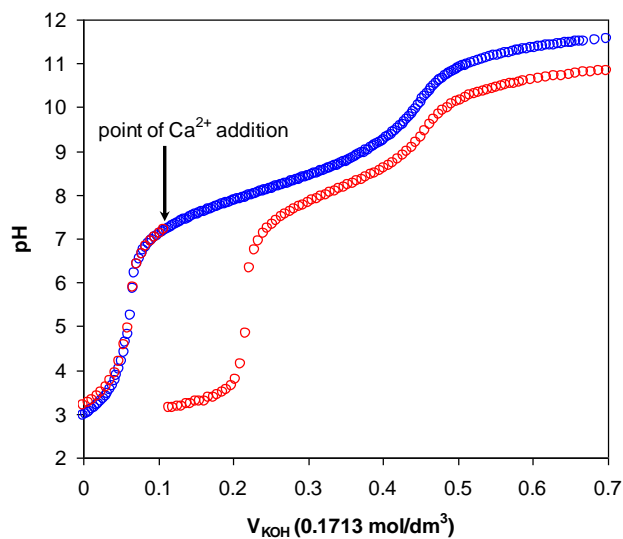

2

3 **Figure S3.** The pH-potentiometric titration of  $L^{12}$  in the absence (blue) and presence (red) of a  
 4 large excess of  $CaCl_2$  ( $C_{tot} = 1.35$  mM  $I = 1.0$  KCl,  $V_{tot} = 10.00$  cm<sup>3</sup>). The samples were  
 5 identical until the point of  $CaCl_2$  addition.  
 6

7

**Table S1.** The protonation constants ( $\log K_i$ ) of  $L^{12}$  ( $I = 1.0$  M KCl, 25°C).

| $L^{12}$     |                 |
|--------------|-----------------|
| $\log K_1^H$ | $9.21 \pm 0.06$ |
| $\log K_2^H$ | $8.48 \pm 0.07$ |
| $\log K_3^H$ | $8.27 \pm 0.07$ |
| $\log K_4^H$ | $7.60 \pm 0.07$ |
| $\log K_5^H$ | $7.47 \pm 0.05$ |
| $\log K_6^H$ | $2.63 \pm 0.06$ |

8

9

1

## Supplementary Information S4

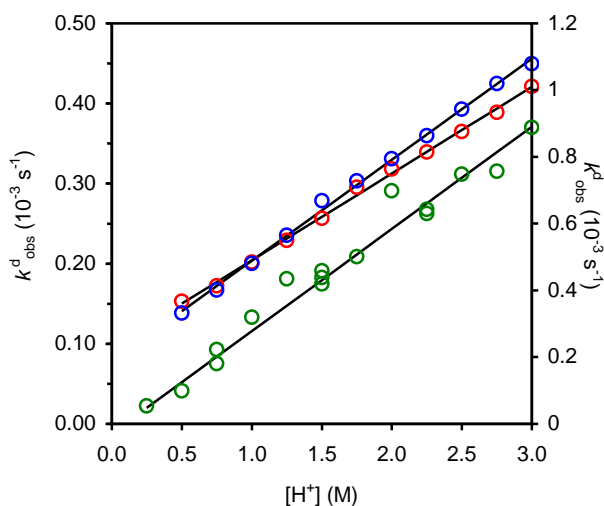

2

3 **Figure S4.** Plots of the observed acid-catalysed dissociation constants ( $k_{obs}^d$ ) against acid  
 4 concentration for CeL<sup>4</sup> (blue, left axis), CeL<sup>8</sup> (red, left axis) and CeL<sup>12</sup> (green, right axis).

5

6 **Table S2.** Biodistribution of ligands labeled with <sup>177</sup>Lu in normal Balb/c mice (n = 4). Data are  
 7 presented as %ID/organ ± standard deviation (s.d.)

| Complex                         | Tissue                            | Time points (h) |             |             |             |
|---------------------------------|-----------------------------------|-----------------|-------------|-------------|-------------|
|                                 |                                   | 0.5             | 1           | 4           | 24          |
| <sup>177</sup> LuL <sup>1</sup> | Blood                             | 2.70 ± 0.39     | 0.53 ± 0.16 | 0.01 ± 0.01 | 0.00 ± 0.00 |
|                                 | Lung                              | 0.30 ± 0.04     | 0.10 ± 0.01 | 0.02 ± 0.01 | 0.01 ± 0.00 |
|                                 | Liver                             | 0.79 ± 0.07     | 0.41 ± 0.08 | 0.29 ± 0.04 | 0.18 ± 0.04 |
|                                 | Spleen                            | 0.05 ± 0.00     | 0.02 ± 0.01 | 0.01 ± 0.00 | 0.01 ± 0.00 |
|                                 | Kidney                            | 1.01 ± 0.17     | 0.60 ± 0.04 | 0.60 ± 0.04 | 0.23 ± 0.05 |
|                                 | Heart                             | 0.09 ± 0.01     | 0.03 ± 0.00 | 0.01 ± 0.00 | 0.01 ± 0.00 |
|                                 | Muscle                            | 4.90 ± 0.93     | 3.96 ± 1.01 | 0.84 ± 0.46 | 0.13 ± 0.11 |
|                                 | Fat                               | 0.89 ± 0.13     | 0.57 ± 0.43 | 0.11 ± 0.01 | 0.06 ± 0.04 |
|                                 | Bone                              | 3.91 ± 3.76     | 1.64 ± 0.39 | 0.63 ± 0.29 | 0.23 ± 0.10 |
|                                 | Cumulative urine excretion (%ID)* | n.d.            | n.d.        | 43.4        | 68.7        |
| <sup>177</sup> LuL <sup>2</sup> | Blood                             | 0.76 ± 0.35     | 0.12 ± 0.07 | 0.00 ± 0.00 | 0.01 ± 0.01 |
|                                 | Lung                              | 0.16 ± 0.04     | 0.02 ± 0.01 | 0.02 ± 0.01 | 0.01 ± 0.00 |
|                                 | Liver                             | 0.48 ± 0.15     | 0.10 ± 0.02 | 0.10 ± 0.02 | 0.05 ± 0.01 |
|                                 | Spleen                            | 0.04 ± 0.01     | 0.01 ± 0.00 | 0.01 ± 0.00 | 0.03 ± 0.04 |
|                                 | Kidney                            | 1.50 ± 0.49     | 0.53 ± 0.06 | 0.45 ± 0.07 | 0.23 ± 0.02 |
|                                 | Muscle                            | 12.14 ± 2.42    | 1.03 ± 0.24 | 0.58 ± 0.39 | 0.35 ± 0.22 |

|                         |                                  |              |             |             |             |
|-------------------------|----------------------------------|--------------|-------------|-------------|-------------|
|                         | Fat                              | 0.89 ± 0.26  | 0.21 ± 0.04 | 0.18 ± 0.11 | 0.10 ± 0.03 |
|                         | Bone                             | 0.16 ± 0.08  | 0.02 ± 0.01 | 0.02 ± 0.01 | 0.42 ± 0.26 |
|                         | Cumulative urine excretion (%ID) | n.d.         | n.d.        | 61.2        | 72.4        |
| $^{177}\text{LuL}^4$    | Blood                            | 3.42 ± 0.53  | 0.47 ± 0.28 | 0.01 ± 0.01 | 0.00 ± 0.00 |
|                         | Lung                             | 0.30 ± 0.05  | 0.06 ± 0.02 | 0.01 ± 0.00 | 0.01 ± 0.01 |
|                         | Liver                            | 0.80 ± 0.13  | 0.29 ± 0.03 | 0.15 ± 0.03 | 0.20 ± 0.04 |
|                         | Spleen                           | 0.07 ± 0.01  | 0.02 ± 0.01 | 0.01 ± 0.00 | 0.00 ± 0.00 |
|                         | Kidney                           | 1.16 ± 0.21  | 0.53 ± 0.04 | 0.30 ± 0.04 | 0.36 ± 0.08 |
|                         | Heart                            | 0.09 ± 0.02  | 0.02 ± 0.00 | 0.01 ± 0.00 | 0.00 ± 0.00 |
|                         | Muscle                           | 5.78 ± 0.89  | 2.86 ± 1.52 | 0.28 ± 0.11 | 0.40 ± 0.19 |
|                         | Fat                              | 0.94 ± 0.21  | 1.00 ± 0.16 | 0.04 ± 0.03 | 0.02 ± 0.01 |
|                         | Bone                             | 3.68 ± 0.56  | 1.71 ± 0.99 | 0.34 ± 0.18 | 0.14 ± 0.08 |
|                         | Cumulative urine excretion (%ID) | n.d.         | n.d.        | 56.7        | 77.4        |
| $^{177}\text{LuL}^8$    | Blood                            | 3.42 ± 0.57  | 0.29 ± 0.03 | 0.01 ± 0.01 | 0.01 ± 0.00 |
|                         | Lung                             | 0.30 ± 0.06  | 0.06 ± 0.01 | 0.03 ± 0.03 | 0.01 ± 0.00 |
|                         | Liver                            | 0.79 ± 0.11  | 0.25 ± 0.07 | 0.19 ± 0.07 | 0.08 ± 0.01 |
|                         | Spleen                           | 0.08 ± 0.04  | 0.01 ± 0.00 | 0.01 ± 0.00 | 0.01 ± 0.00 |
|                         | Kidney                           | 1.00 ± 0.13  | 0.50 ± 0.06 | 0.41 ± 0.08 | 0.34 ± 0.07 |
|                         | Heart                            | 0.10 ± 0.02  | 0.02 ± 0.01 | 0.00 ± 0.00 | 0.00 ± 0.00 |
|                         | Muscle                           | 5.49 ± 1.94  | 3.20 ± 1.58 | 0.24 ± 0.16 | 0.14 ± 0.04 |
|                         | Fat                              | 1.56 ± 1.13  | 0.39 ± 0.22 | 0.06 ± 0.02 | 0.12 ± 0.08 |
|                         | Bone                             | 3.20 ± 1.02  | 0.83 ± 0.35 | 0.30 ± 0.14 | 0.24 ± 0.03 |
|                         | Cumulative urine excretion (%ID) | n.d.         | n.d.        | 53.6        | 63.3        |
| $^{177}\text{LuL}^{12}$ | Blood                            | 3.12 ± 0.99  | 0.27 ± 0.10 | 0.01 ± 0.01 | 0.02 ± 0.01 |
|                         | Lung                             | 0.32 ± 0.10  | 0.07 ± 0.04 | 0.01 ± 0.01 | 0.01 ± 0.00 |
|                         | Liver                            | 0.85 ± 0.26  | 0.21 ± 0.03 | 0.13 ± 0.01 | 0.15 ± 0.05 |
|                         | Spleen                           | 0.06 ± 0.02  | 0.01 ± 0.01 | 0.00 ± 0.00 | 0.01 ± 0.00 |
|                         | Kidney                           | 1.09 ± 0.27  | 0.42 ± 0.02 | 0.35 ± 0.01 | 0.17 ± 0.02 |
|                         | Heart                            | 0.09 ± 0.01  | 0.01 ± 0.01 | 0.00 ± 0.00 | 0.01 ± 0.00 |
|                         | Muscle                           | 16.20 ± 5.18 | 1.12 ± 0.69 | 0.24 ± 0.09 | 0.29 ± 0.13 |
|                         | Fat                              | 1.58 ± 0.59  | 0.25 ± 0.06 | 0.06 ± 0.05 | 0.10 ± 0.05 |
|                         | Bone                             | 3.06 ± 0.82  | 0.81 ± 0.41 | 0.25 ± 0.10 | 0.21 ± 0.10 |
|                         | Cumulative urine excretion (%ID) | n.d.         | n.d.        | 65.7        | 76.7        |

1

2 \* Cumulative urine excretion was determined by housing a group of 4 mice in a metabolic  
3 mouse cage. The urine collected at each specific time point was counted along with a  
4 standard injection dose to calculate the percentage of urinary excretion.

5 n.d.: not determined.

6
